# Supplementary material
Source: Springer Nature journal article supplement (https://www.springermedizin.de/resource/supplementary/40478_2014_122_MOESM2_ESM.pdf/25658200)

**A**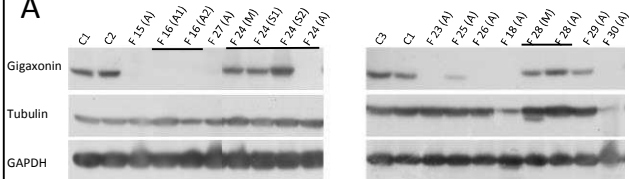**B**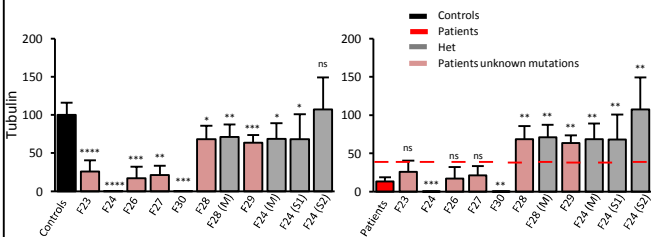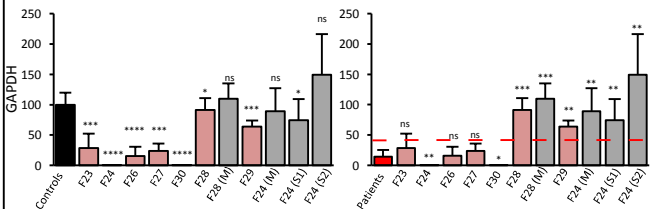**C**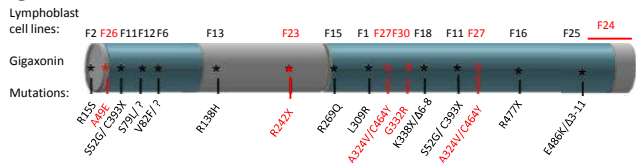**D**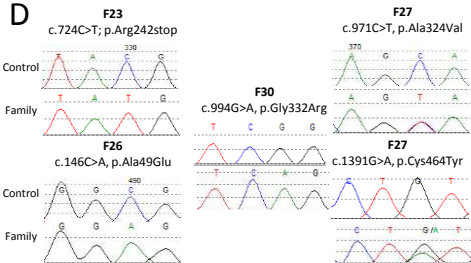**E**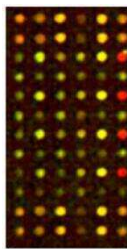**F**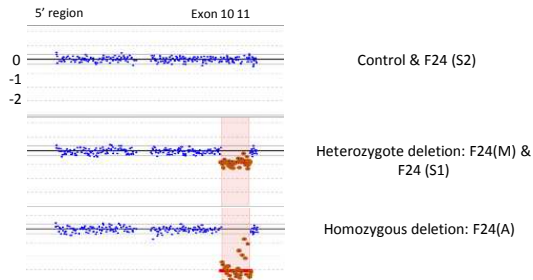

Supplement: MOESM2 [file 25658200]
